# Supplementary material
Source: publisher site journal article supplement (https://www.dovepress.com/article/465844)
Supplement: Supplementary file 1 [file get_supplementary_file.php]

**Supplementary Material**

**Table S1 The search terms of this study**

| Search term | |
| --- | --- |
| #1 | (((TS= (Granulomatous lobular mastitis)) OR TS= (Granulomatous mastitis)) OR TS= (Idiopathic granulomatous lobular mastitis)) OR TS= (Idiopathic granulomatous mastitis) |
| #2 | PY= “2000-2023” |
| #3 | Article type = “Article” and “Review” |
| #4 | Language = “English” |
| #5 | #1 AND #2 AND #3 AND #4 AND #5 |

**Table S2 The detailed information of top 20 references with strongest citation bursts**

| Rank | Year | First Author | Title | Strength |
| --- | --- | --- | --- | --- |
| 1 | 2004 | Bani-Hani Kamal E | Idiopathic granulomatous mastitis: time to avoid unnecessary mastectomies | 8.84 |
| 2 | 2005 | Asogu O | Feasibility of surgical management in patients with granulomatous mastitis | 10.01 |
| 3 | 2005 | La ECH | The role of conservative treatment in idiopathic granulomatous mastitis | 8.12 |
| 4 | 2006 | Akcan A | Granulomatous lobular mastitis: a complex diagnostic and therapeutic problem | 8.7 |
| 5 | 2009 | Larsen LJH | Granulomatous lobular mastitis: imaging, diagnosis, and treatment | 8.74 |
| 6 | 2010 | Erozgen F | Corticosteroid treatment and timing of surgery in idiopathic granulomatous mastitis confusing with breast carcinoma | 10.53 |
| 7 | 2010 | Ocal K | Granulomatous mastitis: clinical, pathological features, and management | 10.53 |
| 8 | 2010 | Kok KYY | Granulomatous mastitis: presentation, treatment and outcome in 43 patients | 8.93 |
| 9 | 2011 | Sakurai K | Evaluation of follow-up strategies for corticosteroid therapy of idiopathic granulomatous mastitis | 8.79 |
| 10 | 2011 | Akbuut S | Is methotrexate an acceptable treatment in the management of idiopathic granulomatous mastitis | 7.23 |
| 11 | 2012 | Gureyik G | Medical and Surgical Treatment of Idiopathic Granulomatous Lobular Mastitis: A Benign Inflammatory Disease Mimicking Invasive Carcinoma | 10.26 |
| 12 | 2012 | Dursun M | Multimodality imaging features of idiopathic granulomatous mastitis: outcome of 12 years of experience | 9.74 |
| 13 | 2012 | ÖzelL | Granulomatous mastitis: is it an autoimmune disease? Diagnostic and therapeutic dilemmas | 8.03 |
| 14 | 2014 | Pandey TS | Idiopathic Granulomatous Mastitis—A Prospective Study of 49 Women and Treatment Outcomes with Steroid Therapy | 8.36 |
| 15 | 2015 | Aghajanzadeh M | Granulomatous mastitis: Presentations, diagnosis, treatment and outcome in 206 patients from the north of Iran | 10.94 |
| 16 | 2014 | Altintoprak F | Aetiology of idiopathic granulomatous mastitis | 7.44 |
| 17 | 2015 | Yabanoglu H | A Comparative Study of Conservative versus Surgical Treatment Protocols for 77 Patients with Idiopathic Granulomatous Mastitis | 7.05 |
| 18 | 2016 | Fazzio RT | Idiopathic granulomatous mastitis: imaging update and review | 7.57 |
| 19 | 2016 | Benson JR | Idiopathic granulomatous mastitis: presentation, investigation and management | 8.13 |
| 20 | 2019 | Martinez-Ramos D | Idiopathic granulomatous mastitis: A systematic review of 3060 patients | 9.2 |

**Table S3 Top 30 most frequent keywords in the field of GLM**

| Rank | Keyword | Occurrences | Total link strength | |
| --- | --- | --- | --- | --- |
| 1 | granulomatous mastitis | 114 | | 486 |
| 2 | management | 108 | | 532 |
| 3 | idiopathic granulomatous mastitis | 94 | | 396 |
| 4 | diagnosis | 91 | | 490 |
| 5 | breast | 87 | | 402 |
| 6 | lobular mastitis | 80 | | 493 |
| 7 | disease | 56 | | 313 |
| 8 | carcinoma | 55 | | 295 |
| 9 | therapy | 43 | | 273 |
| 10 | mastitis | 41 | | 184 |
| 11 | granulomatous lobular mastitis | 41 | | 121 |
| 12 | methotrexate | 38 | | 231 |
| 13 | features | 35 | | 193 |
| 14 | treatment | 26 | | 157 |
| 15 | recurrence | 26 | | 150 |
| 16 | association | 26 | | 154 |
| 17 | surgery | 23 | | 121 |
| 18 | experience | 22 | | 155 |
| 19 | corynebacterium | 22 | | 89 |
| 20 | breast cancer | 20 | | 97 |
| 21 | corticosteroids | 19 | | 109 |
| 22 | needle-aspiration-cytology | 16 | | 104 |
| 23 | mammography | 16 | | 81 |
| 24 | ultrasonography | 15 | | 77 |
| 25 | erythema nodosum | 15 | | 60 |
| 26 | magnetic resonance imaging | 13 | | 72 |
| 27 | inflammation | 13 | | 54 |
| 28 | corticosteroid | 13 | | 76 |
| 29 | MRI | 12 | | 69 |
| 30 | erythema-nodosum | 12 | | 69 |
| 31 | cytology | 12 | | 57 |
